# Supplementary material
Source: PubMed Central journal article supplement (PMC8763046)
Supplement: NIHMS1763415-supplement-1.pdf [file NIHMS1763415-supplement-1.pdf]

Supplemental Table S1. Characteristics of Utah exfoliation glaucoma/syndrome (XFS) patients ages 50-90y and respective unexposed controls.

| Characteristic                            | No XFS |       | XFS patients |       | <i>P</i> <sup>1</sup> |
|-------------------------------------------|--------|-------|--------------|-------|-----------------------|
|                                           | N      | %     | N            | %     |                       |
| Total                                     | 14,713 | 100.0 | 2,943        | 100.0 |                       |
| Female                                    | 10,003 | 68.0  | 2,002        | 68.0  |                       |
| Male                                      | 4,710  | 32.0  | 941          | 32.0  | 0.97                  |
| Age at diagnosis of XFS case <sup>2</sup> |        |       |              |       |                       |
| Mean y (±SD)                              | 74.9   | (8.3) | 74.9         | (8.3) | 0.99                  |
| Years of followup                         |        |       |              |       |                       |
| Mean y (±sd)                              | 18.4   | (4.8) | 18.2         | (4.9) | 0.01                  |
| <1y to 9y                                 | 898    | 6.1   | 211          | 7.2   |                       |
| 10y to 22y                                | 13,815 | 93.9  | 2,732        | 92.8  | 0.03                  |
| Vital status                              |        |       |              |       |                       |
| Alive at 12/31/2017                       | 8,807  | 59.9  | 1,969        | 66.9  |                       |
| Deceased                                  | 5,906  | 40.1  | 974          | 33.1  | <0.0001               |
| Race                                      |        |       |              |       |                       |
| Caucasian                                 | 14,261 | 96.9  | 2,876        | 97.7  |                       |
| Non-Caucasian                             | 452    | 3.1   | 67           | 2.3   | 0.02                  |
| Obesity (BMI ≥ 30) <sup>3</sup>           |        |       |              |       |                       |
| Not indicated                             | 11,917 | 81.0  | 2,561        | 87.0  |                       |
| Indicated                                 | 2,796  | 19.0  | 382          | 13.0  | <0.0001               |
| Tobacco use                               |        |       |              |       |                       |
| Not indicated                             | 12,553 | 85.3  | 2,651        | 90.1  |                       |
| Indicated                                 | 2,160  | 14.7  | 292          | 9.9   | <0.0001               |
| AFib history <sup>4</sup>                 |        |       |              |       |                       |
| Absent                                    | 13,146 | 89.3  | 2,512        | 85.4  |                       |
| Present                                   | 1,567  | 10.7  | 431          | 14.6  | <0.0001               |
| COPD history <sup>4</sup>                 |        |       |              |       |                       |
| Absent                                    | 14,411 | 97.9  | 2,781        | 94.5  |                       |
| Present                                   | 302    | 2.1   | 162          | 5.5   | <0.0001               |
| Hypertension <sup>4</sup>                 |        |       |              |       |                       |
| Absent                                    | 12,323 | 83.8  | 1,869        | 63.5  |                       |
| Present                                   | 2,390  | 16.2  | 1,074        | 36.5  | <0.0001               |
| OSA history <sup>4</sup>                  |        |       |              |       |                       |
| Absent                                    | 13,575 | 92.3  | 2,699        | 91.7  |                       |
| Present                                   | 1,138  | 7.7   | 244          | 8.3   | 0.30                  |
| XFS history <sup>4</sup>                  |        |       |              |       |                       |
| Absent                                    | 14,713 | 100.0 | 0            | 0.0   |                       |
| Present                                   | 0      | 0.0   | 2,943        | 100.0 | —                     |

<sup>1</sup>Discrete measures, chi-square test; continuous measures, paired t test.

<sup>2</sup>Age at time of XFS patient diagnosis. For controls with no XFS, age at the time of diagnosis of their corresponding matched case.

<sup>3</sup>Body mass index (BMI) as height in meters<sup>2</sup> /weight in kg.

<sup>4</sup>ICD-9 diagnosis in the patient medical record from 1996-2015
